# Supplementary material
Source: PubMed Central journal article supplement (PMC2746964)
Supplement: NIHMS27504-supplement-01.pdf [file NIHMS27504-supplement-01.pdf]

buffer) were added in steps to yield 0–2 equiv (S.I.). NMR spectra were recorded immediately after individual titration steps.

### Conclusion

In summary we have identified bis-phenylethynyl amide derivatives as a potent G-quadruplex binding small molecule scaffold. These ligands show very good binding affinity, excellent quadruplex:duplex selectivity and also promising discrimination between intramolecular promoter quadruplexes. Our data suggests, such compounds induce parallel G-quadruplex structure and have potential for G-quadruplex groove recognition. We believe that the modes of G-quadruplex recognition other than via the G-tetrad stacking should be seriously considered for second generation ligands. The biological properties of these molecules are currently under investigation.

**Acknowledgment.** We thank the BBSRC for project grant funding, Cancer Research UK for programme funding and the European Commission (Marie Curie Incoming Postdoctoral Fellowship to J.D. for funding). S.T.D.H. is a recipient of a Netherlands Ramsay Memorial Fellowship and a Human Frontier Science Program Long-term Fellowship (LT00798/2005). We thank Raphaël Rodriguez and Zoë A. E. Waller for useful discussions relating to the SPR experiments.

**Supporting Information Available:** CD, UV and NMR spectroscopic data. This material is available free of charge via the Internet at <http://pubs.acs.org>.

JA8046552
